# Supplementary material for: Mental Reactivation and Pleasantness Judgment of Experience Related to Vision, Hearing, Skin Sensations, Taste and Olfaction
Source: PLoS One. 2016 Jul 11;11(7):e0159036. doi: 10.1371/journal.pone.0159036 (PMC4939968; doi:10.1371/journal.pone.0159036)
Supplement: S3 Data — (XLS) [file pone.0159036.s006.xls]

## Sheet: Intensity of reported emotions
Participant	VH (in V)	VH (in H)	VS (in V)	VS (in S)	VO (in V)	VO (in O)	VT (in V)	VT (in T)	OT (in O)	OT (in T)	VTO (in V)	VTO (in T)	VTO (in O)
1	1	2	1	1	2	2	0	1	1	1	1	1.5	1		V -Vision
2	2	1	0	1	1	1	1	1	1	1	1.5	1	1		H- Hearing
3	1	1	1	1	1	2	1	2	1.5	2	2	2	1.5		S - Skin sensations
4	2	1	1	1	2	3	1	2	2	1	1.5	1	1		O- Olfaction
5	1	2	2	2	2	2	2	2	1	1	1.5	1.5	2		T -Taste
6	2	2	1	1	2.5	2	2	2	3	3	2	3	3
7	2	2	1	1.5	2	1.5	2	2	1	2	2	2	1.5		Median values, N=97
8	2	2	1	1	1	1	0	1	1	2	1	1	1
9	2	2	0	1	2	2	1	1	2.5	2	1.5	2	2		The data used to build Figure 5 (see the main text)
10	2	2	1	1	2.5	2	1	2	2	3	2	2	2
11	1	2	0	1	1	2	1	2	2	1.5	1.5	2	2
12	0	1	1	1	1	1	1	1	1	2	1	2	2
13	1	1	1	1.5	2	2	1	1	2	2	2	2	2
14	2	2	0.5	1	2	2	1	1	1	2	1	2	2
15	1	1	1	1	1	1	1	1	1	2	1	1	1
16	3	2	2	2	3	2	2	1	2	2	2	2	2
17	2	1	1	1	2	2	1	1	1	1	2	2	2
18	0	1	1	1.5	1	1.5	0	0	0	0.5	0.5	0.5	1
19	2	2	1	0.5	1.5	2	1	1	1	2	1	2	1.5
20	3	2	1.5	1	2	2	2	2	2	2	2.5	3	2.5
21	3	3	2	2.5	3	3	2	2	3	3	3	3	3
22	3	3	2	2	2	2	1	1	2	1.5	1	1.5	1
23	2	3	2	2	3	3	2	2	1	2.5	2	2	2
24	1	2	1	1	1	1.5	2	2	2	2	2	2	2
25	0	1	1	1	1	1	1	1	1	1	1	1	1
26	3	3	1.5	1.5	2	1.5	1	2	2.5	3	3	2.5	3
27	1	1	0	0	0.5	1.5	0	0	1	1	0	0	1
28	3	3	2	2	2	3	2	2	2	3	3	3	2
29	2	2	2	2	2	2.5	2	2	2	2	3	3	2
30	1	1	1	1	2	1.5	1	1	1	1	1	1	1
31	2	2	1	1.5	1.5	2	2	2	2	2.5	2	2	2
32	3	2	1	1	2	3	2	2	3	3	3	2.5	2
33	2	2	2	2	1	1	2	2	2.5	2.5	2	2.5	2
34	2	1	2	1	2	2	1	1	1	2	2	2	2
35	2	2	1	1	2	2	2	2	2	2	2	2	2
36	2	2	1	1	2	2	1	1	2	2	2	2	1
37	2	1	2	1.5	2	3	2	2	2	2	2	2	2
38	2	2	1	1	2	2	2	1	1	1.5	2.5	2	2
39	1	2	1	1	3	3	1	1	2	2	1.5	2.5	2
40	2	2	1.5	1	2	2	1	1	2	2	1	2	2
41	2	2	1	1	1	2	1	1	1.5	2	1	2	2
42	1	1	1	1	1	1	1	1	1	1	1	1	1
43	0	1	0	0	0	0	0	0	0	0	0	0	0
44	2	2	1	1	1	2	1	1	1	2	2	2	2
45	2	1	1	1	1.5	1	2	2	2	2	2	3	2
46	2	1	1	1	2	2	2	2	2	2	2	2	2
47	1	2	1	2	2	2	1	1	1.5	2	1	1	1.5
48	1	0	0.5	1	2	2	1	1	1.5	1.5	2	2	1.5
49	2	1	2	2	2	2	2	1	2	1.5	2	2	2
50	3	2	2	2	2	2	2	2	2	3	2	2	2
51	2	2	1.5	2	2	3	1	2	3	2	2	2.5	2
52	2	2	1	1	2.5	2	2	2	2	2	3	2	2
53	3	3	2.5	2	2	2.5	2	2	2	2	2	2.5	1.5
54	3	3	2	2	3	3	2	2	2	2	3	3	2.5
55	2	1	1	1	2	2	1	1	2.5	2.5	2	1.5	2
56	1	1	1	0.5	1.5	2	1	1	1	1.5	1	1	1
57	2	1	1	0.5	2	2	2	2	2	2	2	2	2
58	2	3	2	1	2	2.5	2	2	2	2	2	2	2.5
59	2	3	1.5	1.5	3	2	2	2	3	3	3	3	3
60	2	2	1	1	2	2	1	1	2	2	2	2	2
61	1	2	1	1	2	1.5	0	1	1	1	1	1	1.5
62	3	3	3	3	3	3	3	3	3	3	3	3	3
63	2	3	1	1.5	2	3	2	2	2	3	2	2	1
64	2	2	1	2	1	2	1	1	1.5	2	1	1	1
65	2	3	2	1	2	2	1	1	2	2	1.5	2	2
66	2	2	1	1	2	3	1	2	1	1	1.5	2	2
67	2	2	1	1	1	1	1	1	2	2	2	2	2
68	3	2	1	1	2	2	1	2	2	2	1	2	2
69	3	2	1.5	1	2	1.5	2	1	2	2	2	2	2.5
70	3	1	2	1	3	2	2	2	2	2	2	2	2
71	2	3	1	1	2	1.5	1	1	2	1	1.5	1	1
72	1	2	1	1	2	1	1	1	1	1	1	1	1
73	3	2	0	0	2	3	1	1	1	1	1	1.5	1.5
74	2	2	1	1	1	1	1	1	2	2	2	2	2
75	2	2	1.5	2	2	2	1	2	2	2	2	2	2
76	2	2	1	1	1	1	2	2	1.5	2	2	2	1.5
77	2	2	1	1	2	2	1	1	1	1.5	2	1.5	1
78	2	3	1.5	1	2	2	1	1	1.5	2	2	2	2
79	1	2	1	1	1	2	1	1	1.5	2	1	1	1
80	2	3	1.5	1	2.5	3	2	2	2	2	2	2.5	3
81	2	1	1	1	1	2	1	1	1	1	1.5	1	1
82	2	1	1	1	2	2	2	2	2	2	1	2	1
83	1	1	0.5	1	2	1	1	1	1.5	2	2	2	2
84	2	2	1	0	2	2	0	1	3	3	2	2	3
85	2	1	2	2	3	3	2	3	3	3	2	2	3
86	2	2	2	1	2	2	2	2	2	1	1	2	2
87	2	2	1	1	2.5	2	1	1	2	2	1	2	2
88	2	3	1	2	2.5	2.5	2	2	2	2	3	3	2.5
89	2	2	1	1	2	2	1	1	1	2	1	1	1
90	1	1	2	2	2.5	2	2	1	2	2.5	2.5	2.5	2
91	2	2	1	1	2	2	1	1	1.5	2	2	2	2
92	3	3	1.5	1	3	3	2	2	2	2	2	2.5	2
93	3	3	2	2.5	1.5	2	1	2	3	2.5	2	3	3
94	1	1	0.5	1	1	1	1	1	1	1	1	1	1
95	2	2	1	1	2.5	2	2	2	2	2	3	3	3
96	2	2	1.5	1	2	2	1	2	1	1.5	1	2	2
97	1	1	1	1	1.5	1	1	1	1	2	1	1.5	1
