# Supplementary material for: Mental Reactivation and Pleasantness Judgment of Experience Related to Vision, Hearing, Skin Sensations, Taste and Olfaction
Source: PLoS One. 2016 Jul 11;11(7):e0159036. doi: 10.1371/journal.pone.0159036 (PMC4939968; doi:10.1371/journal.pone.0159036)
Supplement: S5 Data — (XLS) [file pone.0159036.s008.xls]

## Sheet: Time of the pleasantness judgme
Participant	Vision	Hearing	Taste	Olfaction	Touch	Mixed skin	Body skin
1	3107	3599	2621	2620	2545	2602	2252		Median values in ms, N=97
2	2264	2411	2104.5	2033.5	2075	2066	1985
3	2178	2168.5	2141.5	2100	2248	2237	2176		The data used to build Figure 7 (see the main text)
4	1855.5	1998.5	1685	1743.5	3996.5	2920	2517
5	1472	1351.5	1309.5	1220	2284.5	2137	2141
6	2273.5	2358.5	2307.5	2194	2508.5	2304	2062
7	2351.5	2232	2234	2157	3964	4976	3805
8	2888	3305	2707	2746	2292	1907	2028
9	1942	1997.5	1925.5	1925	1917	1951	1913
10	2238.5	2250.5	2190	2232	2698	2889	2970
11	2652	2181.5	2162	2197	2395	2272	2710
12	2030	2106	1994	1987.5	3392.5	3183	2797
13	2279.5	2198	2116.5	2147	2708.5	2500	2554
14	2332.5	3189	2030.5	2153	2479.5	2382	2208
15	2186	2265	2141	2129.5	2082	1995	2020
16	2104	2309	1982	2023	1625.5	1319	1388
17	3836	3779	3658	3394	2658.5	2516	2836
18	2048	2069.5	1624	1704	2560	2359	2616
19	1910	1873	1952	1912	3167	3106	2698
20	2806	2684	2725	2545	1971	1962	1928
21	2270.5	2234	2230.5	2235.5	2350	2387	2159
22	2097.5	2063.5	2049.5	2007.5	2155.5	2139	2177
23	2035.5	2065.5	2005	2000.5	2100.5	2037	2008
24	2494.5	2884	2008.5	2175	3004.5	2552	2366
25	2369	2457.5	2234	2215.5	2442.5	2367	2234
26	2547	2436.5	2288.5	2429.5	2852.5	2736	2933
27	2409.5	2421.5	2223	2127	2373	2564	2110
28	2534	2469.5	2370	2381.5	2398	2325	2291
29	2070.5	2093	2041.5	2069	2089.5	2070	2002
30	2679	2539	2300.5	2242	2696.5	2567	2601
31	3125	3005	2947	2979	3294	3760	3011
32	2009.5	2034	1962.5	1961.5	2031	1994	1891
33	2319.5	2263	1955	1921.5	2904.5	2229	2129
34	2735	2750	2359	2538	3278.5	2637	2441
35	2788	2442	2259.5	2339	3150	2657	2547
36	1996.5	2128.5	2014.5	2038.5	2232	2122	2032
37	2247.5	2105.5	2208.5	2206.5	2873.5	2475	2550
38	2376.5	2666	2182	2215.5	2657.5	2490	3022
39	2138	2145.5	2142.5	2183	2344.5	2310	2266
40	2184.5	2158	2020	2019.5	2378	2141	2013
41	2342	2393.5	2144.5	2306.5	2449.5	2502	2297
42	2542	2601	2484.5	2431.5	2541.5	2636	2597
43	2075.5	2075	2077	2074	2077	2112	2186
44	2480.5	2527	2279.5	2443	3264.5	3127	2921
45	2115	2077.5	2042	2100	2196	2157	2116
46	1882	1903	1884	1885	1885	1883	1928
47	2063.5	1950	1936	1948	1992	2027	1956
48	2553	2557	2457	2383	3137.5	2557	2214
49	2417	2346.5	2493.5	2373.5	2630.5	2450	2328
50	2361	2341	2237.5	2364	2240	2603	2361
51	2709	2444	2547	2201	2667	2450	2290
52	3109	3424	3062	3136	4287.5	3096	2796
53	1984.5	2018	1944	1942	2054.5	2020	2060
54	2543	2812	2506	2373.5	2733.5	2678	2716
55	2331	2263.5	2060.5	2184.5	2241	2218	2215
56	2739	3679	2677	2698	3002	3298	2975
57	2242.5	2215	2117.5	2078.5	2217	2307	2162
58	1943	1934	1940.5	1981.5	1988.5	1980	1970
59	2440.5	2636	2255.5	2299	2827	2596	2367
60	2504	2490	2208	2203.5	3339.5	2809	2576
61	3628	3668	3099	3219	4943.5	4073	4381
62	2342.5	2378	2174.5	2251	2540	2520	2364
63	2793	2599	2515	2400	2776.5	2519	2693
64	3077	3078	2592	2607	2924.5	2998	2977
65	2340.5	2254	2105	2115.5	2615.5	2256	2209
66	2587	2437	2324.5	2245	3435	2768	2299
67	2438.5	2479.5	2283.5	2382	2753.5	2677	2345
68	3508	3175	3013	2906	3909.5	4067	3620
69	2305	2365	2194	2195.5	2364.5	2352	2410
70	2238.5	2278	2201.5	2191	2358.5	2288	2289
71	2647	2414.5	2670	2434.5	3030	3224	2366
72	1943.5	1965	1936	1891	1992.5	1972	1933
73	1939	1966.5	1933.5	1899.5	1961	1934	1861
74	2292	2248	2202	2165	2330	2320	2398
75	2077.5	2096	2009.5	1971	2137.5	2074	1981
76	4154	4601	4199	3499	4290	5126	4034
77	2643	2834	2546	2594	3273.5	3242	2477
78	2232.5	2426	2081	2080	2694.5	2561	2262
79	2208.5	2286.5	2173	2137	2401	2290	2290
80	3674	3522	2970	3294	4138	4033	3263
81	2471.5	2521	2338	2325	2991.5	2628	2397
82	3025	4158	2704	2945	4276	3465	2809
83	2983	2863	2643	2655	3092.5	3409	2986
84	1947	1972.5	2080.5	1929	1953	2007	2163
85	1954.5	2025.5	1941.5	1940.5	2050.5	2023	2017
86	2462.5	2352.5	2318	2527	2717.5	2701	2552
87	5775	5679	4348	4104	6082	6470	6483
88	2015.5	2012.5	2061.5	2016	2086.5	2028	2086
89	2837	3249	2326.5	2398	2386	2395	2226
90	2585	2593	2262	2362.5	3033.5	2844	2593
91	3677	2889	2792	2896	3833	3580	3018
92	2600	2919	2562	2257.5	3922	3326	3100
93	4700	4926	4886	4014	5263.5	5373	5020
94	2035	2182.5	2103	2143	2111.5	2152	2105
95	2188.5	2348.5	2264	2240.5	2361.5	2228	2144
96	2874	2758	2312	2624	2908	3100	2175
97	2464.5	2444	2302	2262	2514	2722	2538
